# Supplementary material
Source: publisher site journal article supplement (https://www.dovepress.com/article/608394)
Supplement: Supplementary file 1 [file 608394%20Revised%20Supplementary%20Material.docx]

Supplementary Materials

ORIGINAL RESEARCH

**Nanoengineered Macrophages for In Vivo Three-dimensional Photoacoustic Imaging and Immunotherapy of Acute Lung Injury**

Yibo Tang1,*, Chaohao Liang1,*, Fan Meng1,2,*, Wenjie Yin1, Fengbing He1 and Jian Zhang1

1School of Biomedical Engineering, The First Affiliated Hospital of Guangzhou Medical University, Guangzhou Medical University, Guangzhou 511436, People’s Republic of China; 2College of Biomedical Engineering & Instrument Science, Zhejiang University, Hangzhou 310027, People’s Republic of China

*These authors contributed equally to this work

Correspondence: Jian Zhang, School of Biomedical Engineering, The First Affiliated Hospital of Guangzhou Medical University, 1 Xinzhao Road, Xinzhao Town, Panyu District, Guangzhou, Guangdong, People’s Republic of China, Email [jianzhang@gzhmu.edu.cn](mailto:jianzhang@gzhmu.edu.cn)

# Figure Legends


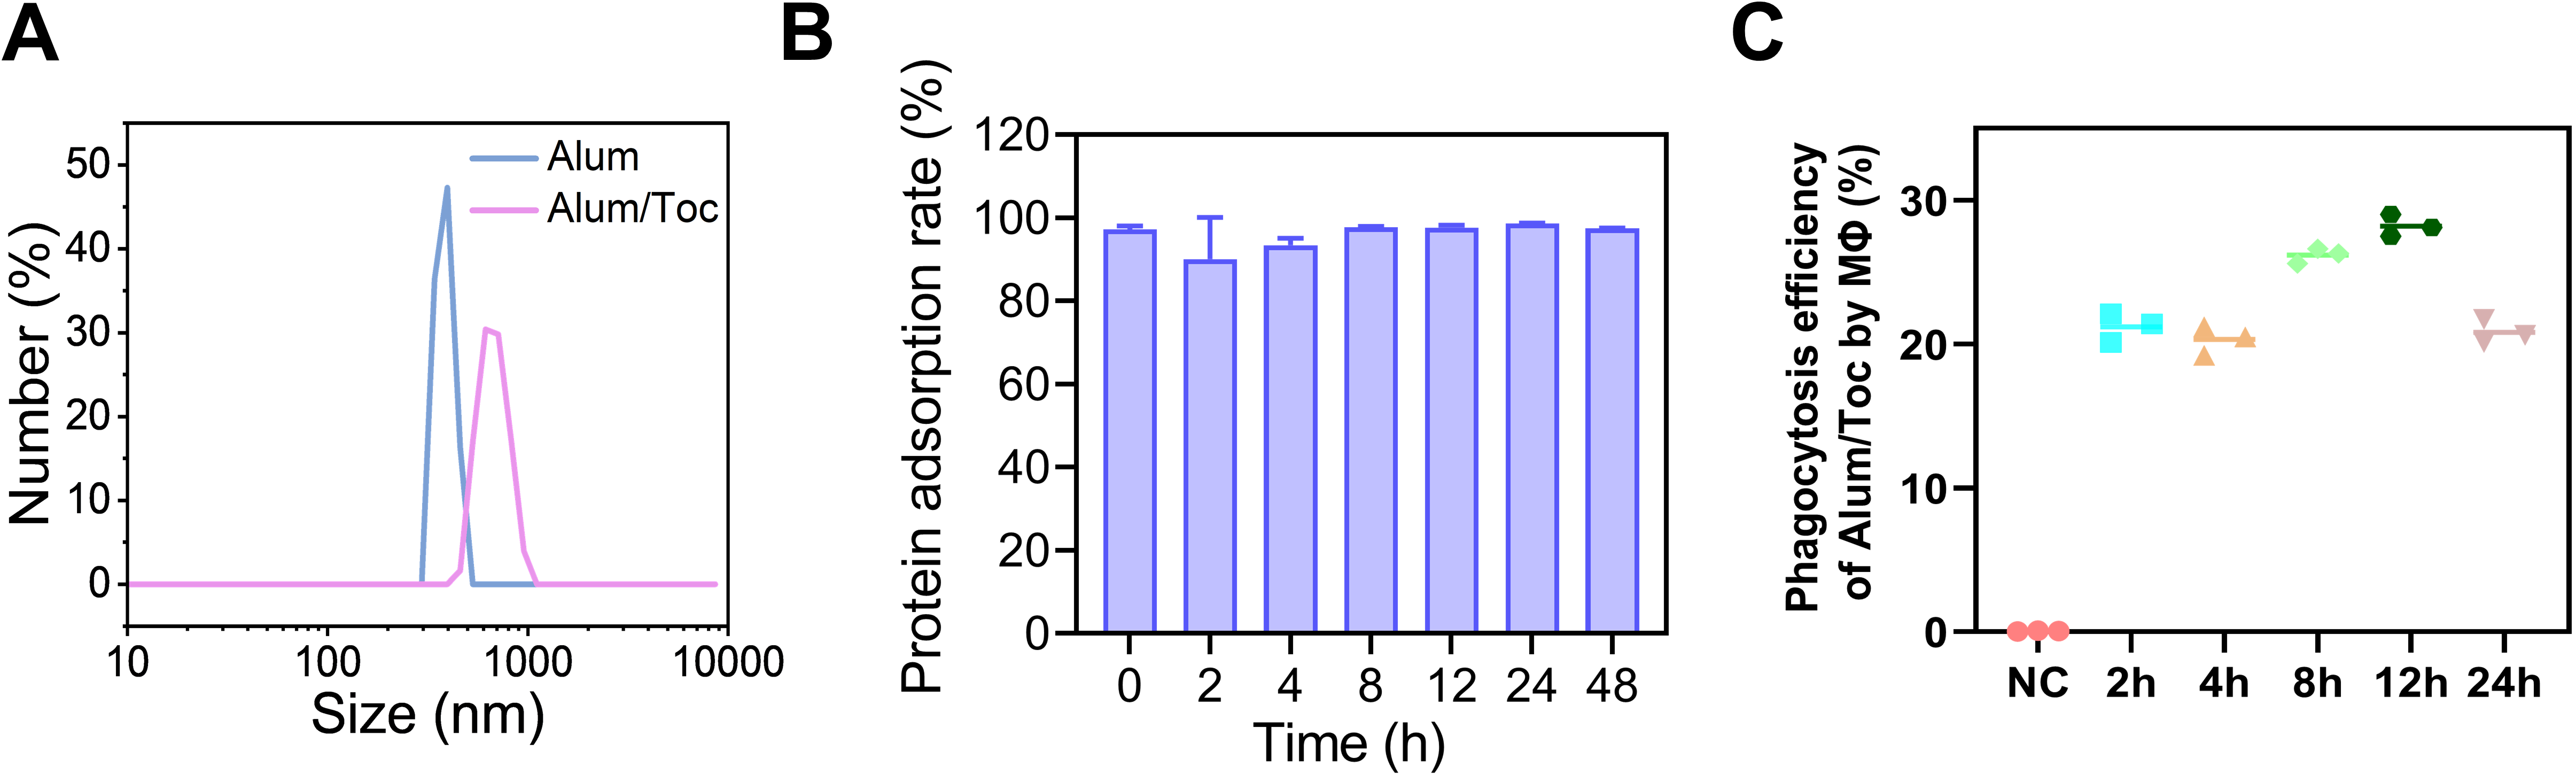


**Figure S1** Physicochemical properties and cellular internalization of Alum/Toc. (A) Size distribution of Alum and Alum/Toc measured by DLS. (B) Adsorption efficiency of Alum on Toc at 0, 2, 4, 8, 12, 24, and 48 h. (C) Flow cytometry was used to quantify phagocytosis efficiency of Alum/Toc by MΦ at 0, 2, 4, 8, 12, and 24 h.


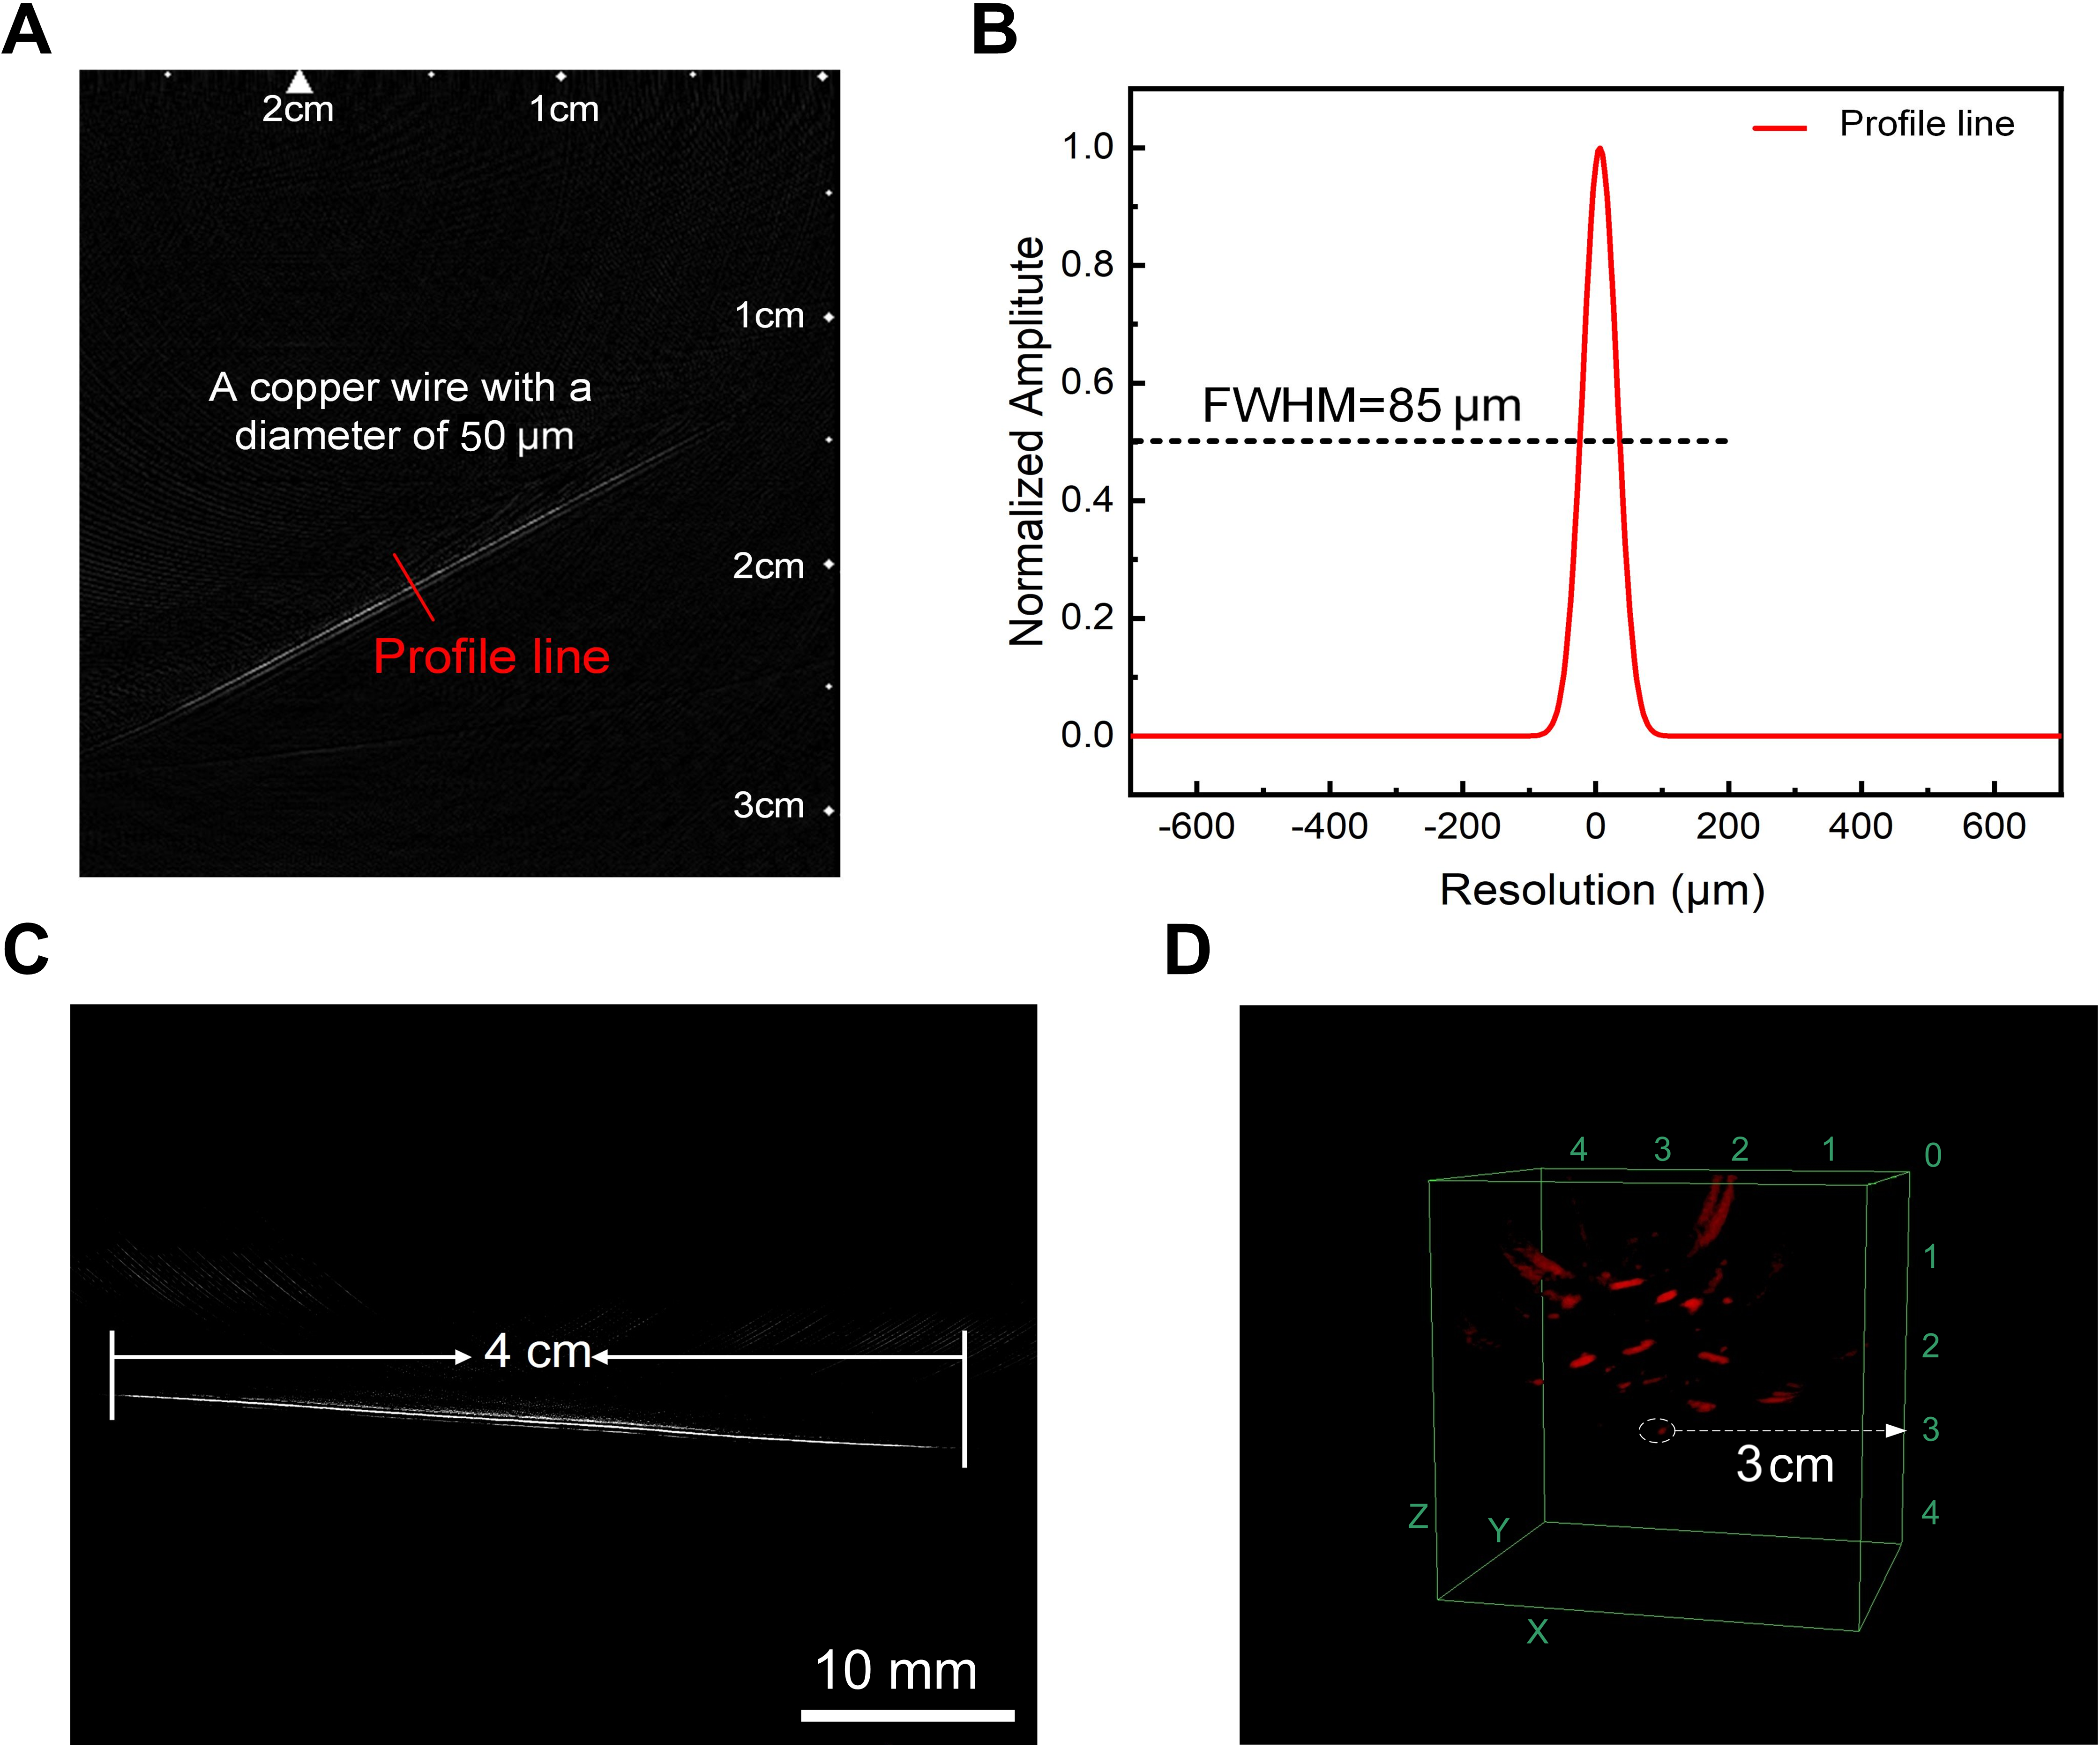


**Figure S2** Characterization of the PAT system parameters. (A) PA image of a copper wire. (B) The Gaussian fitting curve of the PA signals at the location of the red line of the copper wire. (C) PA image of the imaging width of the copper wire. (D) Three-dimensional PA image of a fabricated sample containing multiple copper wires immobilized in agar.


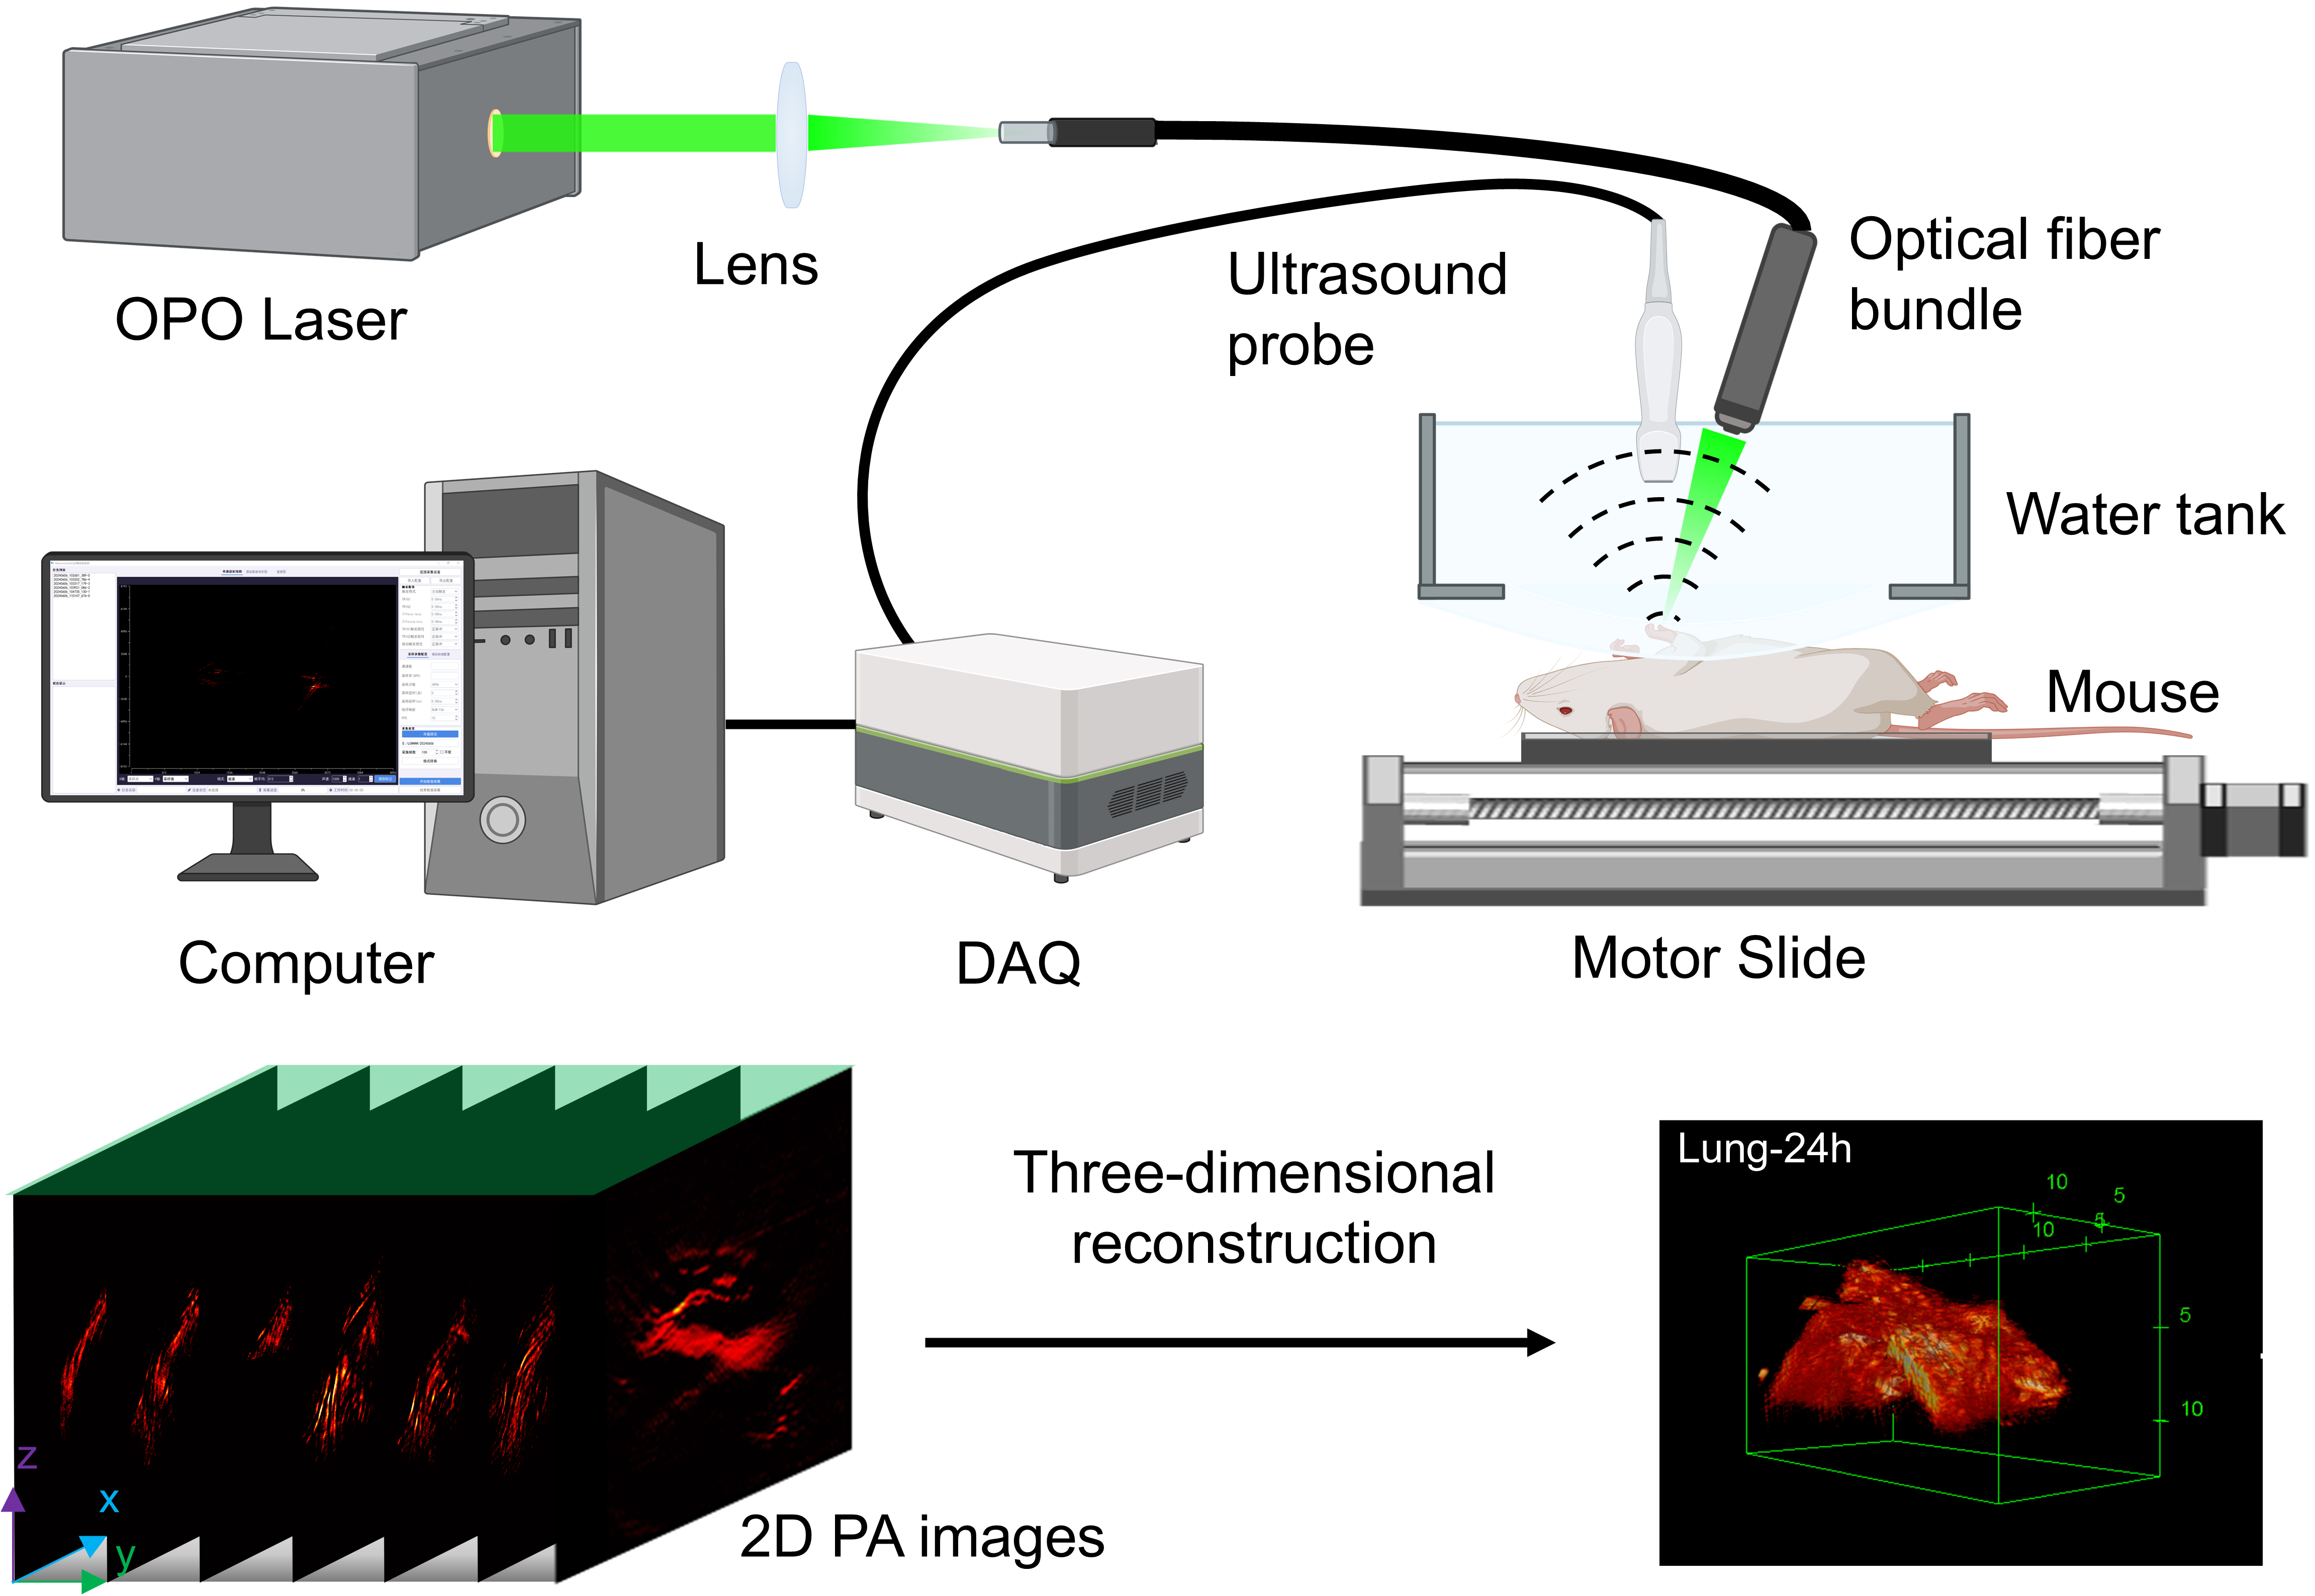


**Figure S3** Schematic diagram of the PACT system. The PACT system primarily consists of a MarsonicsDAQ PA data acquisition unit, a tunable nanosecond pulsed laser, a convex lens for beam focusing, a fiber bundle, and a 128-element linear ultrasound transducer.


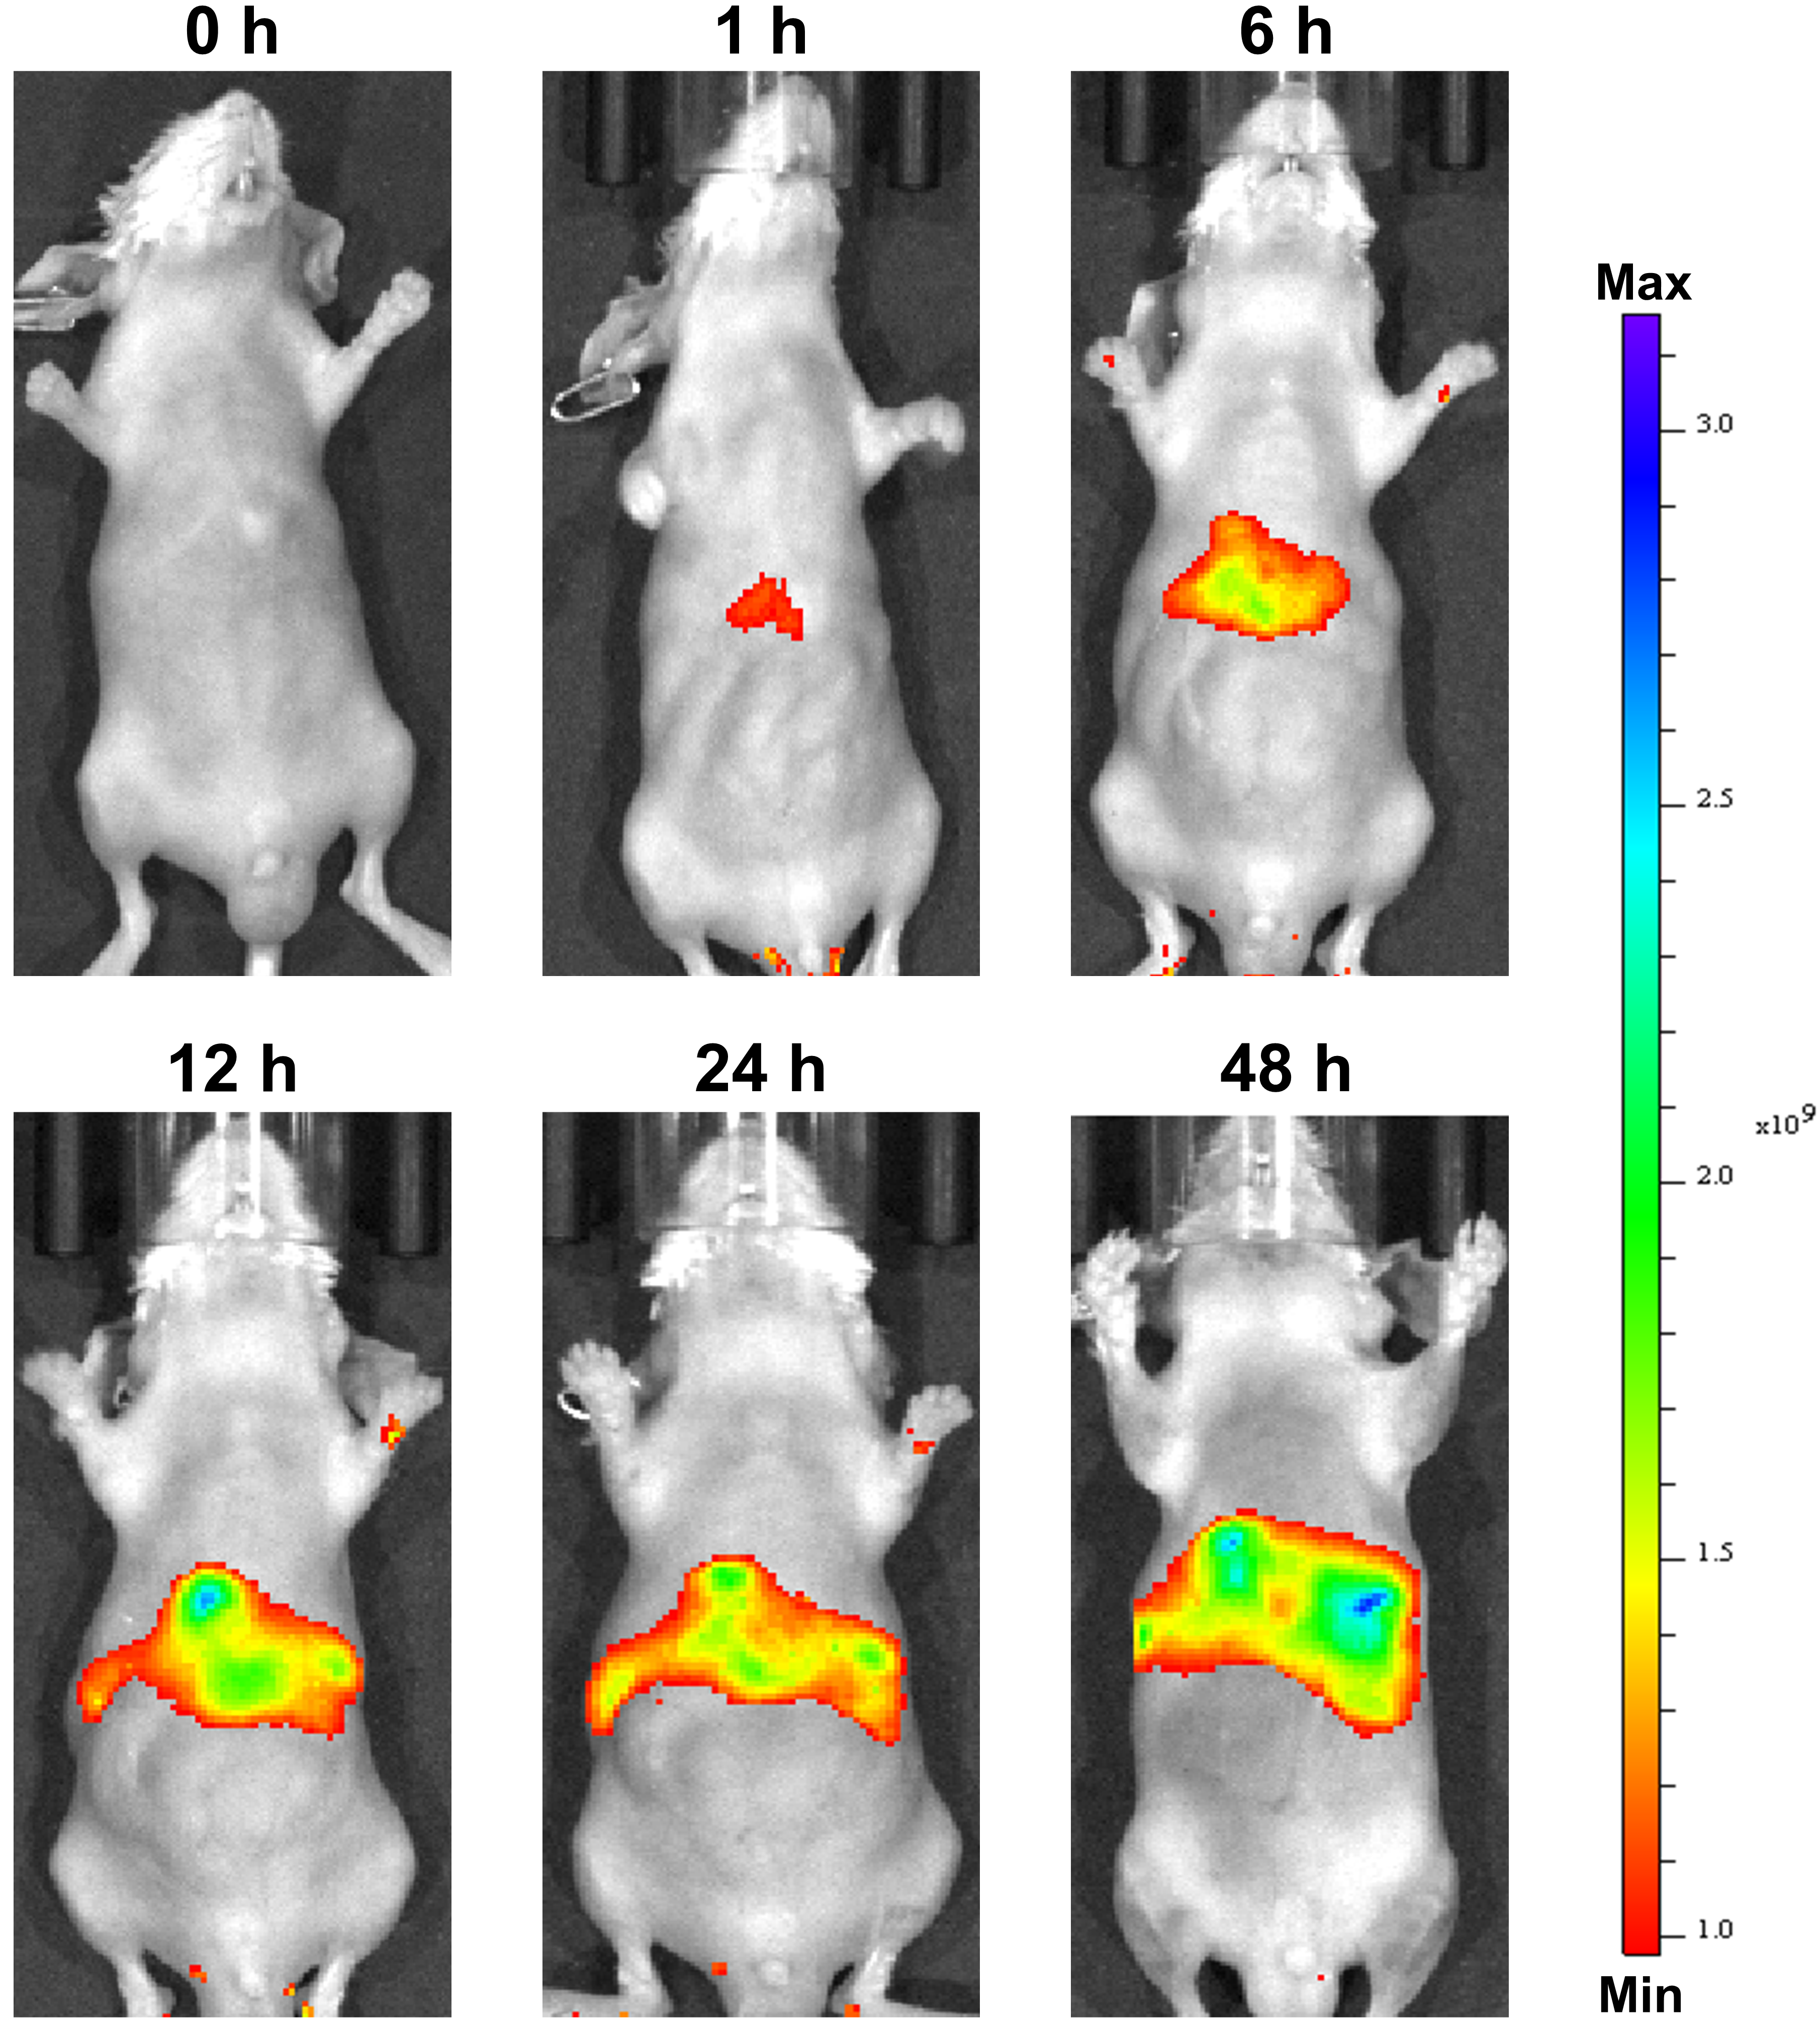


**Figure S4** *In vivo* fluorescence imaging of MΦ/ICG@Alum/Toc distribution in ALI mice at 0, 2, 4, 8, 12, and 24 h after tail vein injection.


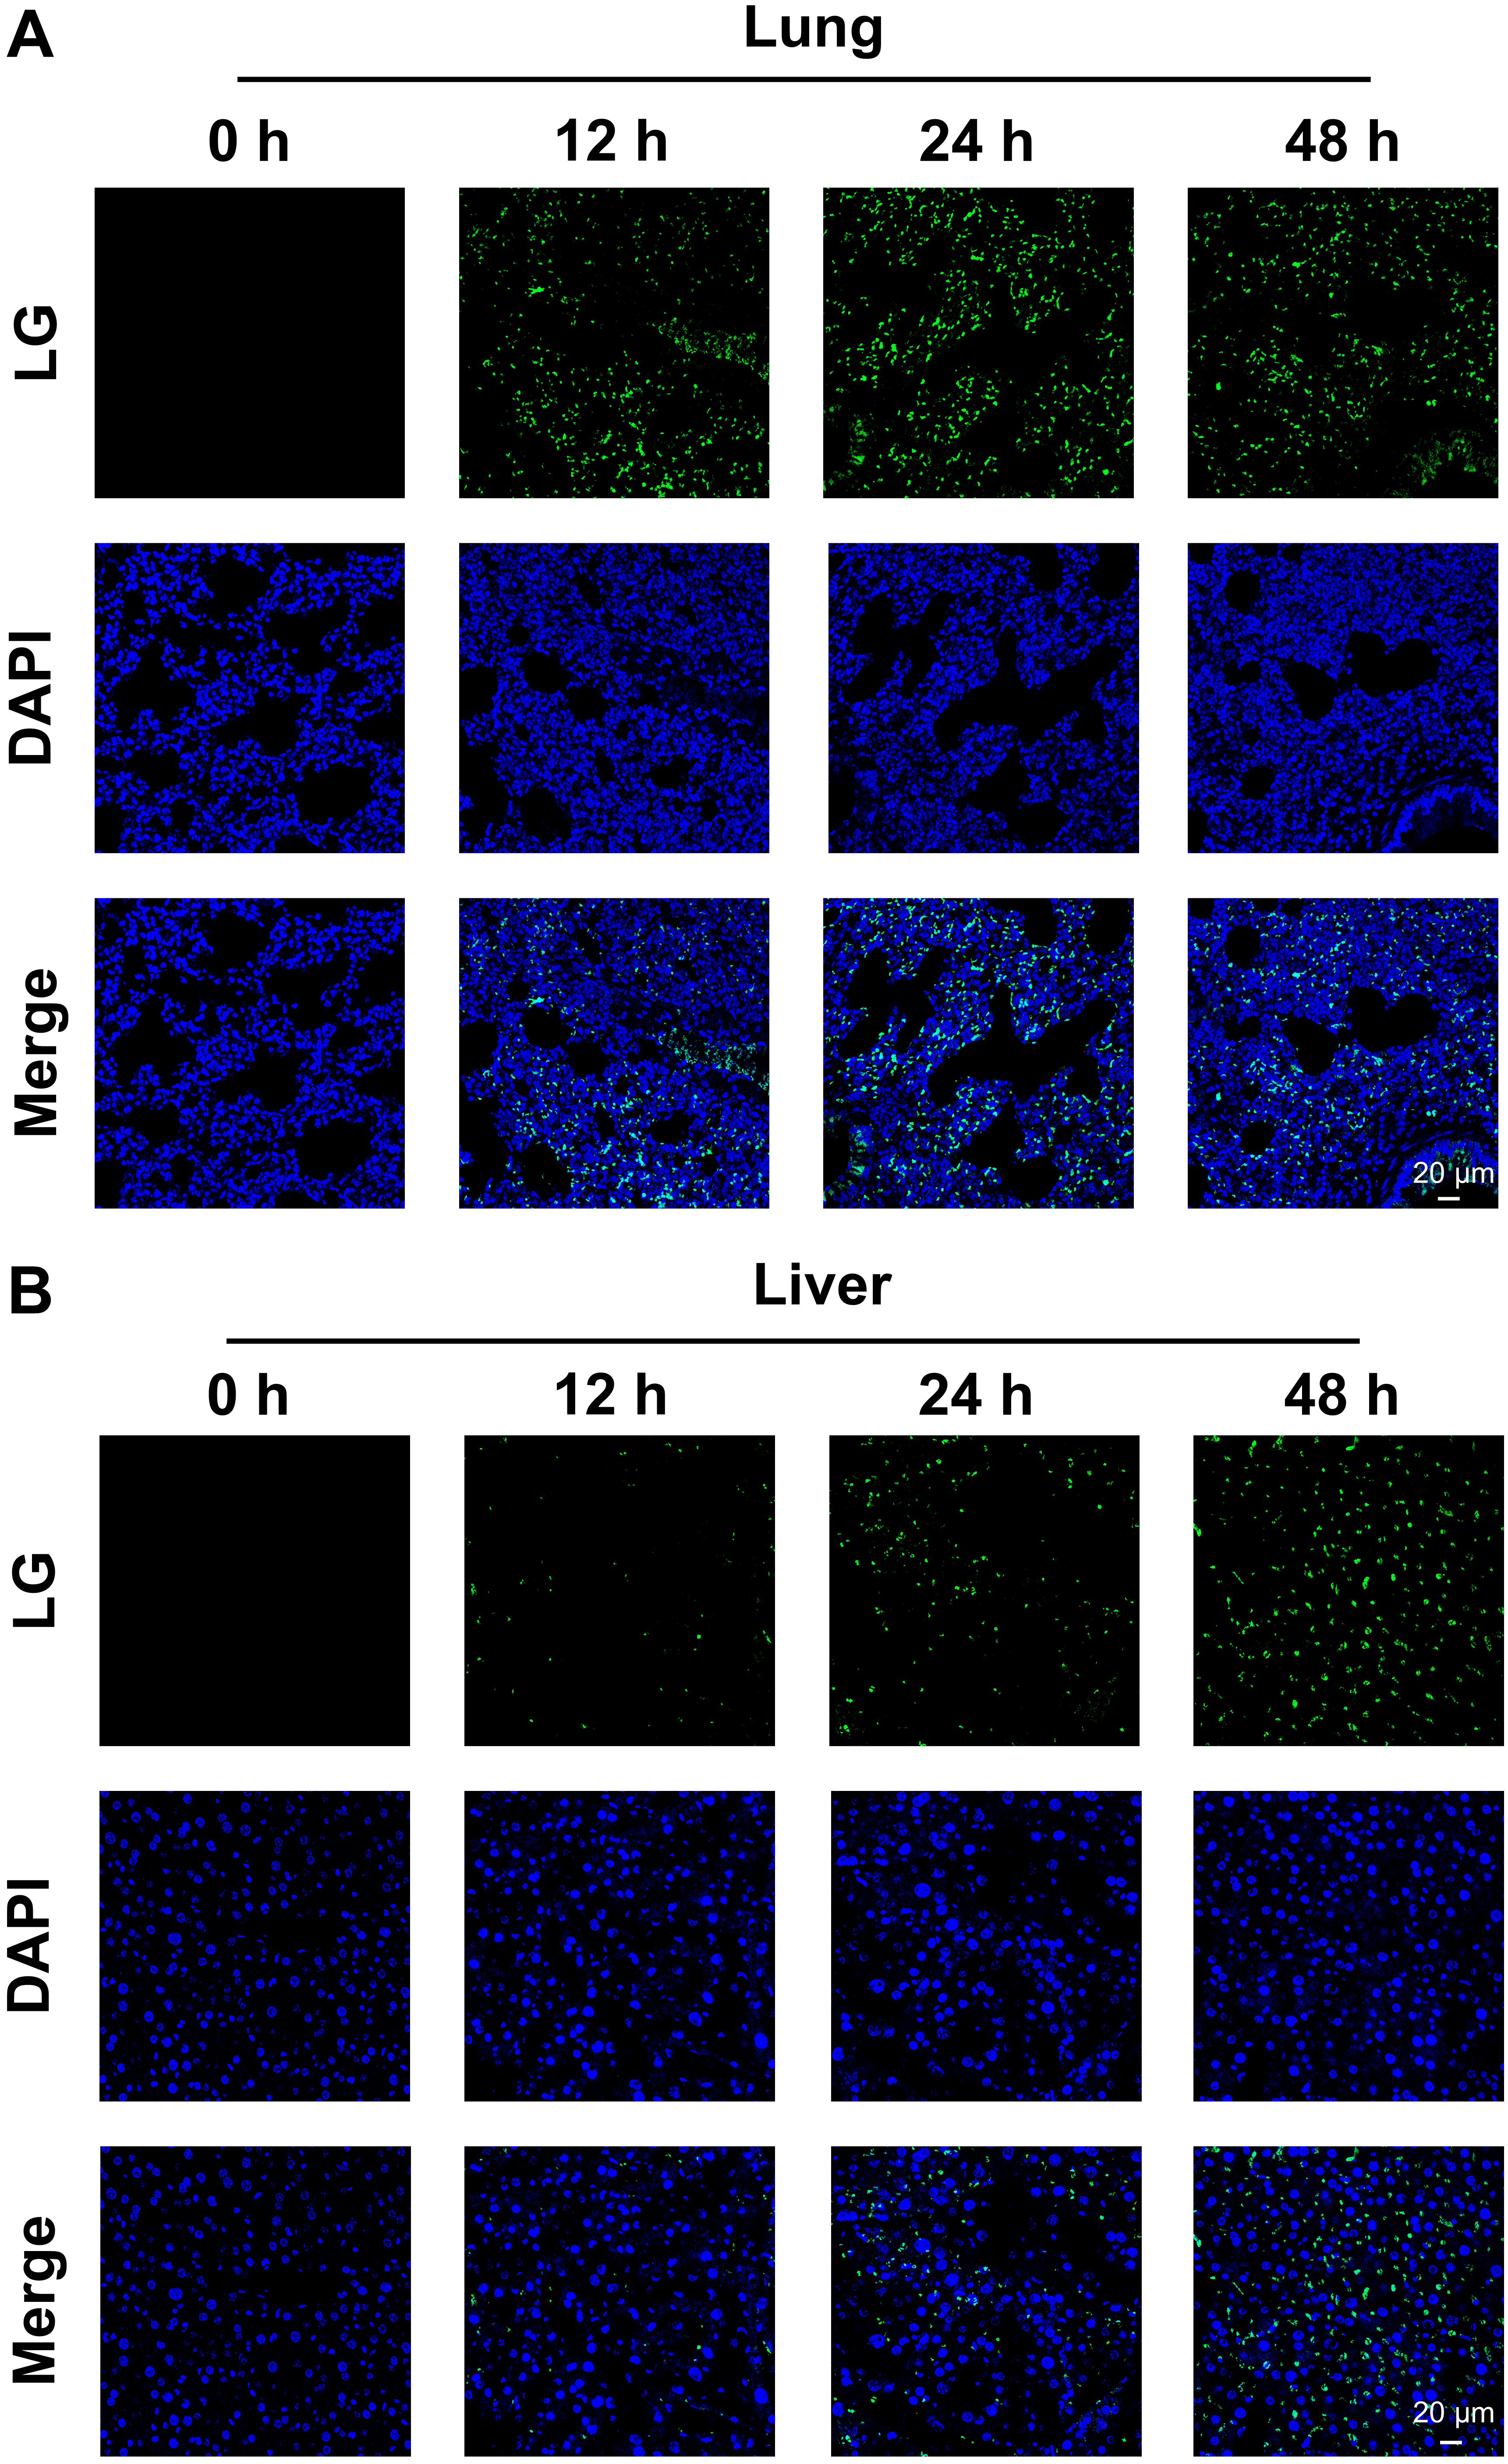


**Figure S5** Fluorescence microscopy of lung and liver sections at 0, 12, 24, and 48 h after tail vein injection of MΦ/ICG@Alum/Toc in ALI mice. Representative images show the distribution of LG‑labeled MΦ/ICG@Alum/Toc (green fluorescence) in (A) lung and (B) liver tissues collected at the indicated time points.


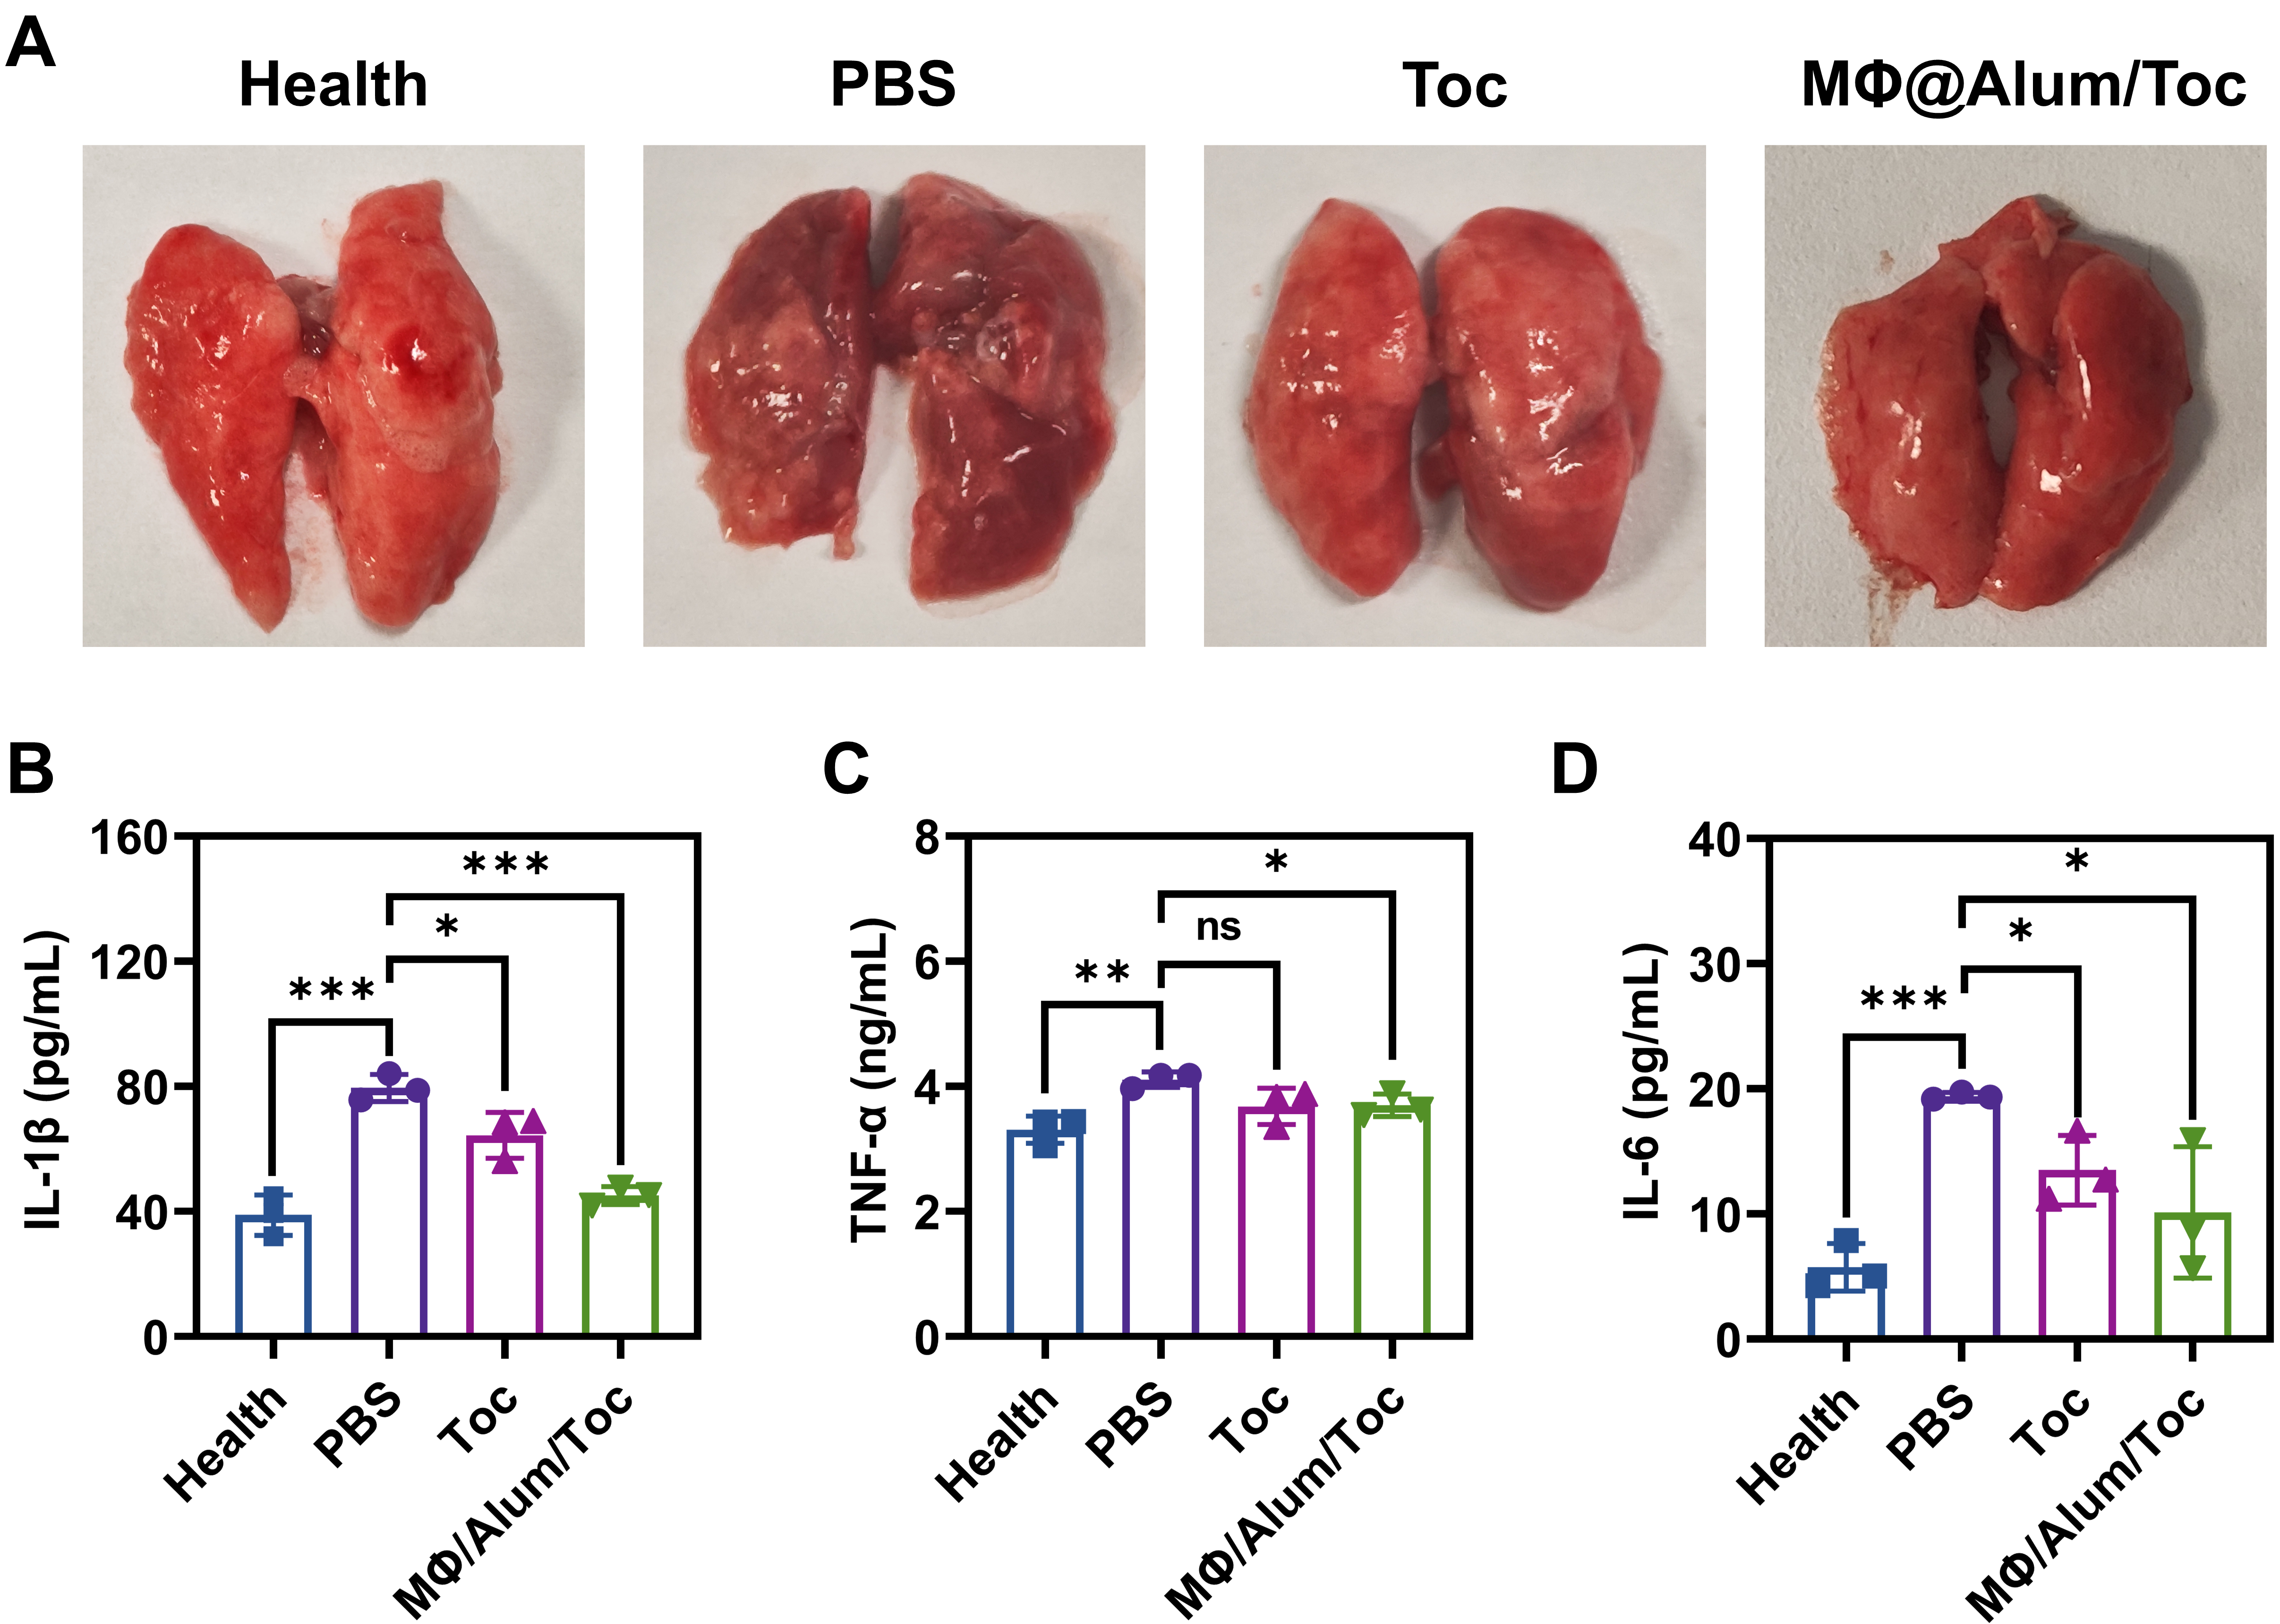


**Figure S6** Lung tissue morphology and pro-inflammatory cytokine expression in ALI mice following different treatments. (A) Gross morphological appearance of whole lungs. (B-D) Concentrations of IL-1β (B), TNF-α (C), and IL-6 (D) in lung tissue homogenates measured by ELISA. Data are presented as mean ± SD (n = 3). Statistical significance was determined using a two-tailed unpaired Student’s *t*-test for comparisons between two groups. **P* < 0.05, ***P* < 0.01, ****P* < 0.001; ns, not significant.


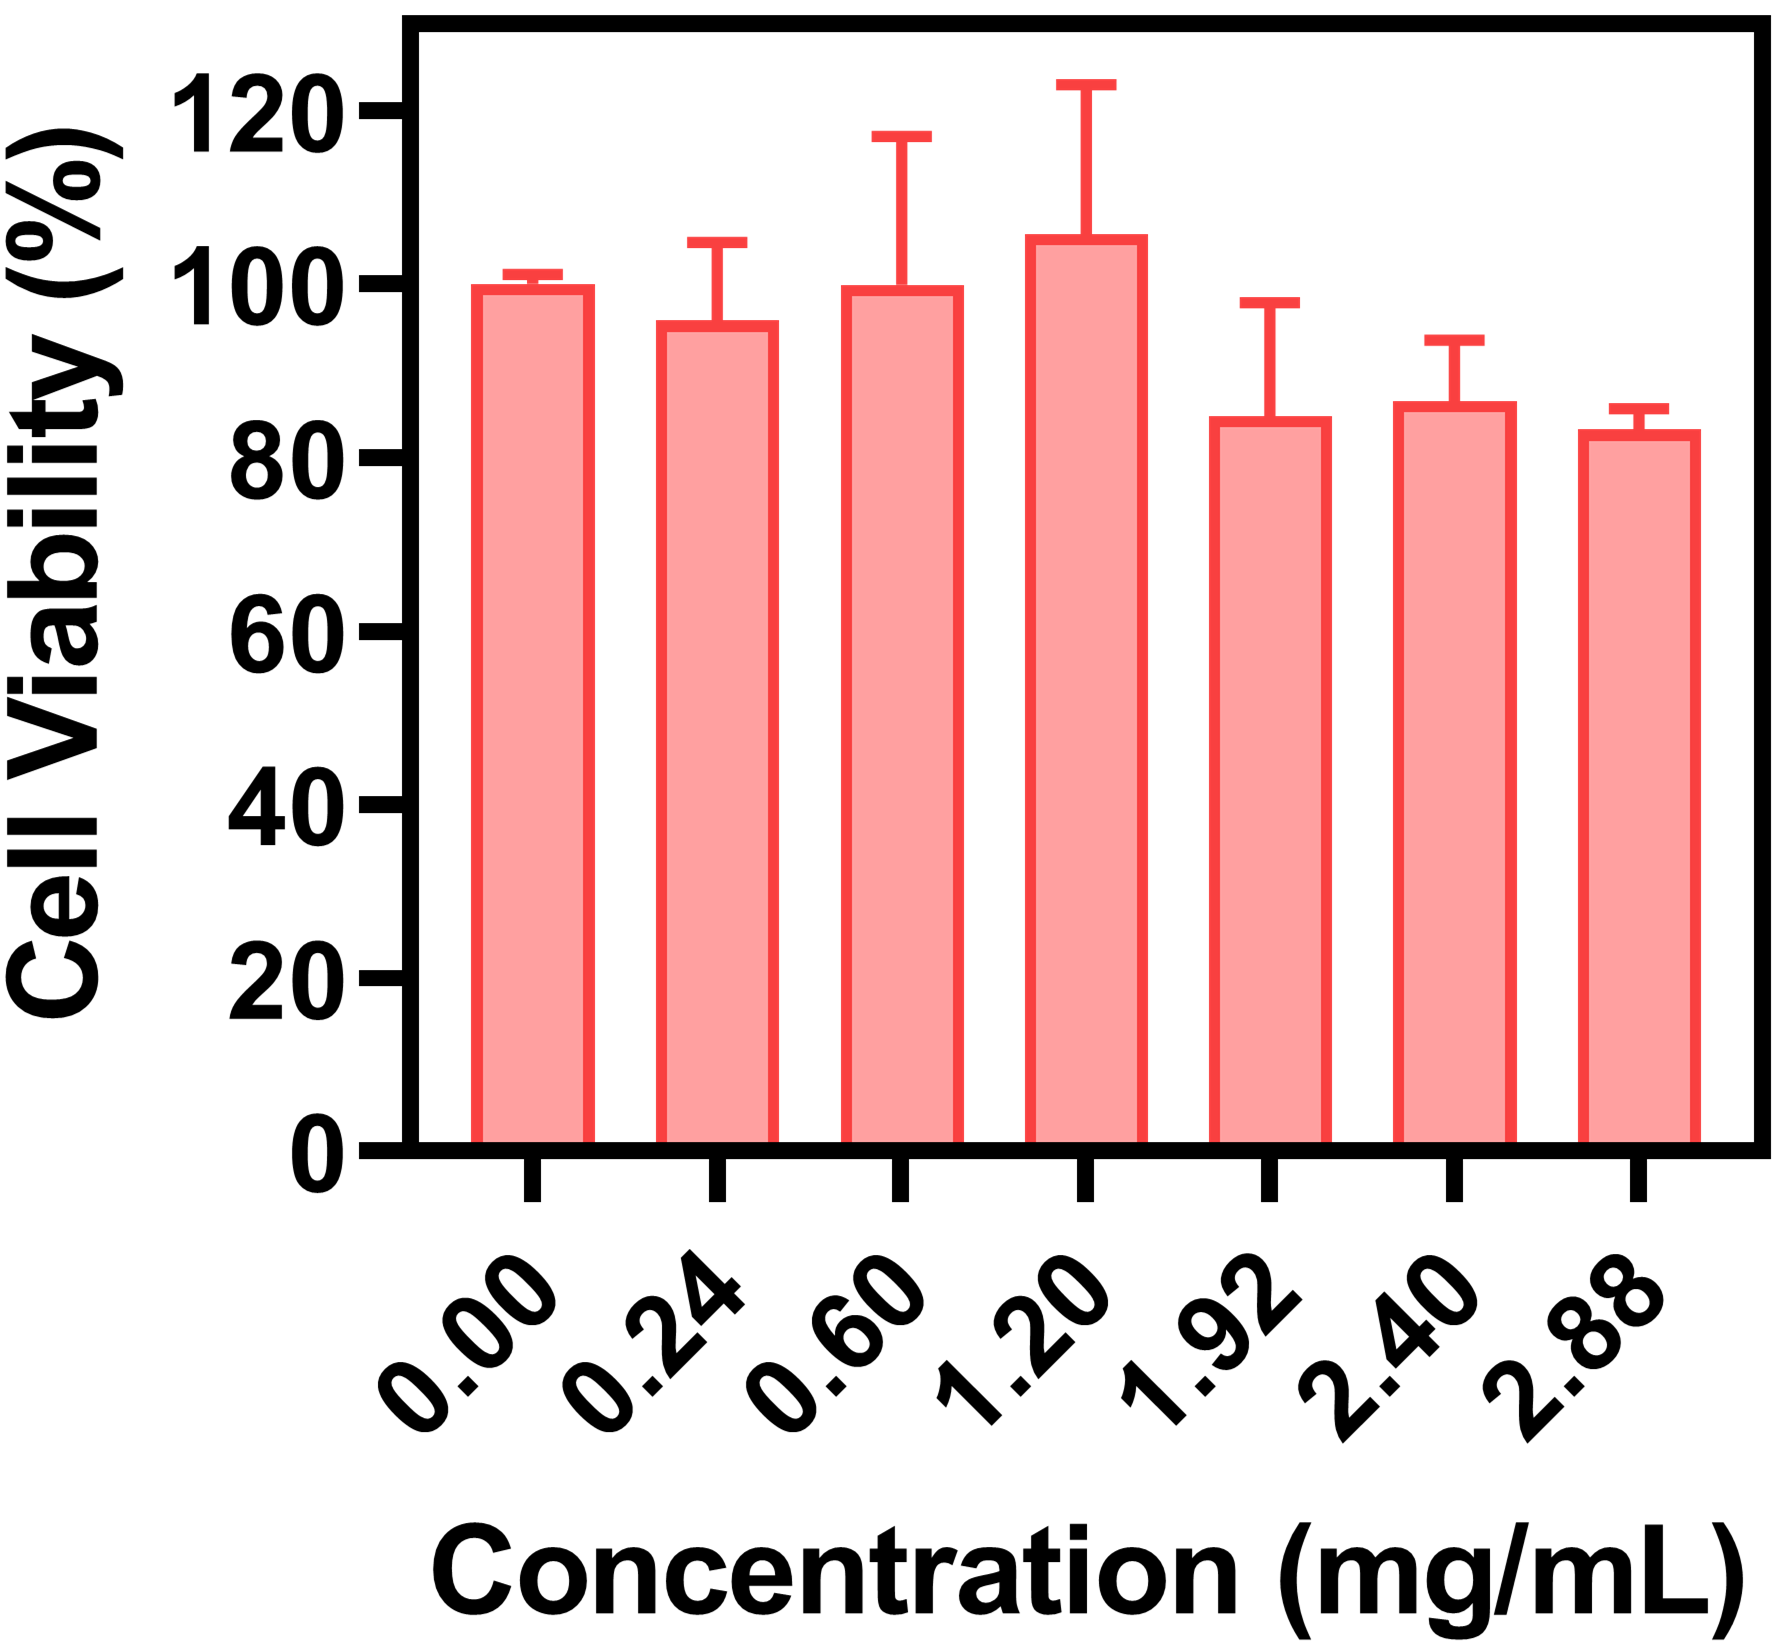


**Figure S7** Cytotoxicity of Alum/Toc against macrophages.
